# Supplementary material
Source: publisher figshare collection journal article supplement (https://asha.figshare.com/articles/dataset/_/27997529)
Supplement: Supplementary file 1 [file 2]

**Supplemental Material S1.** DLD CELF-5 scores.

|           | Core<br>Language | Expressive<br>Language | Receptive<br>Language | Language<br>Content<br>Index | Recalling<br>Sentences | Formulated<br>Sentences | Understanding<br>Spoken<br>Paragraphs |
|-----------|------------------|------------------------|-----------------------|------------------------------|------------------------|-------------------------|---------------------------------------|
| <i>M</i>  | 79.75            | 83.80                  | 88.75                 | 89.20                        | 7.00                   | 6.80                    | 5.60                                  |
| <i>SD</i> | 9.98             | 9.93                   | 10.87                 | 9.12                         | 1.87                   | 1.92                    | 1.34                                  |

*Note.* *M* = mean; *SD* = standard deviation; Core, Expressive, and Receptive Language and Language Content Index = Standard scores; Recalling Sentences, Formulated Sentences, and Understanding Spoken Paragraphs = Scaled scores.
