# Supplementary material
Source: publisher figshare collection journal article supplement (https://asha.figshare.com/articles/dataset/_/27997529)
Supplement: Supplementary file 2 [file 2]

**Supplemental Material S5.** By-participant socioeconomic and health-related risk factors.

|                                           | P1                                     | P2                                                                                                                                                                                                              | P3                                                                                                                             | P4                                                                    | P5                               |
|-------------------------------------------|----------------------------------------|-----------------------------------------------------------------------------------------------------------------------------------------------------------------------------------------------------------------|--------------------------------------------------------------------------------------------------------------------------------|-----------------------------------------------------------------------|----------------------------------|
| <b>Socioeconomic</b>                      |                                        |                                                                                                                                                                                                                 |                                                                                                                                |                                                                       |                                  |
| <i>Maternal education</i>                 | High school or GED                     | Master's degree                                                                                                                                                                                                 | Master's degree                                                                                                                | Associate's degree                                                    | Bachelor's degree                |
| <i>Maternal daily activities</i>          | Working full time (research assistant) | Working full time (education non-profit)                                                                                                                                                                        | Working full time (teacher)                                                                                                    | Working full time (artist/ designer)                                  | Working part time (tax preparer) |
| <i>Family income</i>                      | \$75,000-99,000                        | \$100,000 and greater                                                                                                                                                                                           | \$100,000 and greater                                                                                                          | \$100,000 and greater                                                 | \$100,000 and greater            |
| <b>Health</b>                             |                                        |                                                                                                                                                                                                                 |                                                                                                                                |                                                                       |                                  |
| Birth weight                              | Normal range                           | Slightly below normal range                                                                                                                                                                                     | Normal range                                                                                                                   | Normal range                                                          | Normal range                     |
| Significant birth medical history         |                                        | Hyperbilirubinemia (jaundice, yellow skin & eyes); Meconium aspiration (inhalation of first feces); Respiratory distress (breathing problems); Oxygen supplement; Neonatal Intensive Care Unit (NICU) admission | Large head circumference; Hyperbilirubinemia (jaundice, yellow skin & eyes); Blood sugar issues; irritable/ inconsolable/colic | Hyperbilirubinemia (jaundice, yellow skin & eyes); Low fluid in utero |                                  |
| <b>Development</b>                        |                                        |                                                                                                                                                                                                                 |                                                                                                                                |                                                                       |                                  |
| Early feeding difficulty                  | No                                     | No                                                                                                                                                                                                              | Yes; poor suck                                                                                                                 | Yes; poor suck; irritable/ inconsolable/colic                         | Yes                              |
| Significant developmental medical history | Strep Throat (recurrent)               | Tonsils and Adenoids removed; Tubes                                                                                                                                                                             | Excessively clumsy, uncoordinated; broken nose, cyst removed from throat area, tubes two times                                 | Sleep disturbances                                                    | Pinning of fractured humerus     |
| Daycare                                   | No                                     | Yes; 1 year old (40 hours/week)                                                                                                                                                                                 | Yes; 2 years old (15 hours/week)                                                                                               | No                                                                    | No                               |
| Nursery school or preschool               | Yes; 4 years old (30 hours/week)       | Yes; 2 years old (45 hours/week)                                                                                                                                                                                | Yes; 3 years old (25 hours/week)                                                                                               | Yes; NA (24 hours/week)                                               | Yes; NA (9 hours/week)           |

*Note.* P = participant.
