# Supplementary material
Source: publisher figshare collection journal article supplement (https://asha.figshare.com/articles/dataset/_/27997529)
Supplement: Supplementary file 3 [file 2]

**Supplemental Material S6.** Quality of life questionnaire results; means and standard deviations reported.

| Variable                                                                                                              | DLD            |
|-----------------------------------------------------------------------------------------------------------------------|----------------|
| In general, how happy or unhappy do you usually feel?<br>(Likert scale 0-8)                                           | 6.6<br>1.52    |
| Percent of the time I feel <i>happy</i>                                                                               | 56.00<br>21.62 |
| Percent of the time I feel <i>neutral</i>                                                                             | 37.20<br>27.15 |
| Percent of the time I feel <i>unhappy</i>                                                                             | 21.60<br>11.15 |
| In general, I consider myself not a very happy person – a very happy person<br>(Likert scale 0-7)                     | 6.20<br>1.30   |
| Compared to most of my peers, I consider myself not a very happy person – a very happy person (Likert scale 0-7)      | 5.60<br>1.34   |
| Some people are generally very happy, how well does this describe you, not at all – very much<br>(Likert scale 0-7)   | 5.40<br>1.82   |
| Some people are generally not very happy, how well does this describe you, not at all – very much (Likert scale 0-7)  | 1.75<br>1.50   |
| How secure do you feel about your financial situation? not at all – totally<br>(Likert scale 1-5)                     | 3.20<br>1.48   |
| Do sensory issues in the environment make it difficult to do things you want to do? never – always (Likert scale 1-5) | 3.00<br>2.00   |
| Are you satisfied with your current friendships? very dissatisfied – very satisfied<br>(Likert scale 1-5)             | 4.20<br>0.45   |
| Can you ‘be yourself’ around your friends/people you know well? not at all – totally<br>(Likert scale 1-5)            | 4.75<br>0.50   |
| Do you have enough support from others to make important decisions? not at all – totally<br>(Likert scale 1-5)        | 5.00<br>0.00   |

|                                                                                                                                                            |              |
|------------------------------------------------------------------------------------------------------------------------------------------------------------|--------------|
| Do you have enough support from others to deal with problems? not at all – totally<br>(Likert scale 1-5)                                                   | 4.00<br>1.73 |
| Do you feel there are barriers when accessing health services? never – always<br>(Likert scale 1-5)                                                        | 1.60<br>1.34 |
| Do you feel there are barriers to your needs being met in official situations (e.g., work,<br>landlord)? never – always (Likert scale 1-5)                 | 2.50<br>1.91 |
| Life satisfaction (e.g., if I could live my life over, I would change almost nothing; the<br>conditions of my life are excellent, etc.) (Likert scale 1-7) | 5.28<br>0.83 |

---

*Note.* All questions represent the ASD-Quality of Life Scale, except for the final question which is an aggregated value from the Satisfaction with Life Scale.
