# Supplementary material
Source: publisher figshare collection journal article supplement (https://asha.figshare.com/articles/dataset/_/27997529)
Supplement: Supplementary file 4 [file 2]

**Supplemental Material S3.** Speech-language and specialized services history.

|                                                                                                | P1                                                                                                                                                                                                                                                                                                                                          | P2                                                                                                                                                                                                                                         | P3                                                                                                                                                                                                                                                      | P4                                                                                                                                                                                                                                                                                                                                                                    | P5                                                                                                                                                                                                                                       |
|------------------------------------------------------------------------------------------------|---------------------------------------------------------------------------------------------------------------------------------------------------------------------------------------------------------------------------------------------------------------------------------------------------------------------------------------------|--------------------------------------------------------------------------------------------------------------------------------------------------------------------------------------------------------------------------------------------|---------------------------------------------------------------------------------------------------------------------------------------------------------------------------------------------------------------------------------------------------------|-----------------------------------------------------------------------------------------------------------------------------------------------------------------------------------------------------------------------------------------------------------------------------------------------------------------------------------------------------------------------|------------------------------------------------------------------------------------------------------------------------------------------------------------------------------------------------------------------------------------------|
| Significant speech, language, and communication problems, or were these a problem in the past? | Yes;<br>He has a thought he would like to share and then would have difficulty expressing what he wants to say. Ex would be he would start his thought process and then stop and move onto something else.                                                                                                                                  | Yes;<br>speech articulation                                                                                                                                                                                                                | Yes;<br>language delay and dyslexia                                                                                                                                                                                                                     | No                                                                                                                                                                                                                                                                                                                                                                    | No                                                                                                                                                                                                                                       |
| Current speech, language, or other concerns? Please explain.                                   | Specific learning disability, sees speech therapist 9th grade, no longer other services but gets help within groups and with teachers, such as math; mother noticed at 5 years backwards, switches words, hard to understand sentences make no sense; had 3 head injuries no LOC, but had blurred vision, no further treatment besides rest | Current dyslexia and math specific learning disability school diagnosis, reading and language concerns and previous articulation, does not qualify for school-based services, some difficulty with social interaction, medication for ADHD | Current special education 1-2 hours for reading, qualifying for dyslexia in school and parent reported anxiety-weekly therapy, birth to three for apraxia – though this is not a current diagnosis - and delays, continued speech concerns to 8th grade | Current special education classroom for one period, ADHD, dyslexia dysgraphia, reading comprehension, language-based learning disability, trouble getting thoughts on paper, ADHD from psychiatrist - medication for anxiety, executive function-related accommodations, but difficulty understanding directions, memorize instead of reading, good vocabulary skills | Reading difficulties and trouble with jumbled thoughts and grammar currently, saw speech therapist until 3rd grade, 504 in high school for reading, current accommodations through student disability services that are not very helpful |
| How much did your child babble and coo                                                         | The same as siblings or                                                                                                                                                                                                                                                                                                                     | The same as siblings or other                                                                                                                                                                                                              | Less than expected                                                                                                                                                                                                                                      | More than expected                                                                                                                                                                                                                                                                                                                                                    | The same as siblings or other                                                                                                                                                                                                            |

| during the first<br>six months of<br>life?                                     | other children<br>his/her age                                                            | children<br>his/her age                                         |                                                                                                                                                                            |                                                                                                                                                                                         | children his/her<br>age                                                                                               |
|--------------------------------------------------------------------------------|------------------------------------------------------------------------------------------|-----------------------------------------------------------------|----------------------------------------------------------------------------------------------------------------------------------------------------------------------------|-----------------------------------------------------------------------------------------------------------------------------------------------------------------------------------------|-----------------------------------------------------------------------------------------------------------------------|
| Intervention                                                                   |                                                                                          |                                                                 |                                                                                                                                                                            |                                                                                                                                                                                         |                                                                                                                       |
| <i>Birth to three</i>                                                          | No                                                                                       | No                                                              | Yes                                                                                                                                                                        | No                                                                                                                                                                                      | No                                                                                                                    |
| <i>History of<br/>intervention or<br/>special<br/>educational<br/>services</i> | Yes; speech-<br>language<br>therapy;<br>occupational<br>therapy;<br>special<br>education | Yes;<br>speech-<br>language<br>therapy;<br>special<br>education | Yes; speech-<br>language<br>therapy; sensory<br>integration<br>therapy; physical<br>therapy;<br>occupational<br>therapy;<br>developmental<br>therapy; special<br>education | Yes; speech-language<br>therapy; sensory<br>integration therapy;<br>behavioral therapy;<br>physical therapy;<br>occupational therapy;<br>developmental<br>therapy; special<br>education | No; behavioral<br>therapy                                                                                             |
| <i>Current services</i>                                                        | Speech-<br>language<br>therapy                                                           | Special<br>education                                            |                                                                                                                                                                            | Speech-language<br>therapy; behavioral<br>therapy; occupational<br>therapy; special<br>education                                                                                        | Accommodations<br>(per parent<br>report: "for test<br>anxiety among<br>other things. Not<br>totally aware of<br>all") |

---

*Note.* P = participant.
