# Supplementary material
Source: publisher figshare collection journal article supplement (https://asha.figshare.com/articles/dataset/_/27997529)
Supplement: Supplementary file 5 [file 2]

**Supplemental Material S7.** Correlations between quality of life and language measures.

| Quality of Life Measure                                                                                               | CELF-5<br>Core<br>Language | CELF-5<br>Recalling<br>Sentences | Grammatic-<br>ality<br>judgement A` |
|-----------------------------------------------------------------------------------------------------------------------|----------------------------|----------------------------------|-------------------------------------|
| In general, how happy or unhappy do you usually feel? (Likert scale 0-8)                                              | -0.33                      | -0.18                            | -0.92*                              |
| Percent of the time I feel <i>happy</i>                                                                               | -0.90                      | -0.53                            | -0.39                               |
| Percent of the time I feel <i>neutral</i>                                                                             | -0.78                      | -0.63                            | -0.72                               |
| Percent of the time I feel <i>unhappy</i>                                                                             | 0.12                       | -0.11                            | 0.00                                |
| In general, I consider myself not a very happy person – a very happy person (Likert scale 0-7)                        | -0.22                      | 0.00                             | -0.65                               |
| Compared to most of my peers, I consider myself not a very happy person – a very happy person (Likert scale 0-7)      | 0.44                       | 0.60                             | -0.68                               |
| Some people are generally very happy, how well does this describe you, not at all – very much (Likert scale 0-7)      | 0.03                       | 0.22                             | -0.87                               |
| Some people are generally not very happy, how well does this describe you, not at all – very much (Likert scale 0-7)  | -0.99                      | -0.71                            | 0.40                                |
| How secure do you feel about your financial situation? not at all – totally (Likert scale 1-5)                        | -0.62                      | -0.63                            | 0.63                                |
| Do sensory issues in the environment make it difficult to do things you want to do? never – always (Likert scale 1-5) | 0.38                       | 0.27                             | 0.87                                |
| Are you satisfied with your current friendships? very dissatisfied – very satisfied (Likert scale 1-5)                | 0.48                       | 0.30                             | -0.43                               |
| Can you 'be yourself' around your friends/people you know well? not at all – totally (Likert scale 1-5)               | -0.22                      | 0.00                             | -0.99**                             |
| Do you have enough support from others to make important decisions? not at all – totally (Likert scale 1-5)           | NA                         | NA                               | NA                                  |
| Do you have enough support from others to deal with problems? not at all – totally (Likert scale 1-5)                 | -0.36                      | -0.62                            | 0.33                                |
| Do you feel there are barriers when accessing health services? never – always (Likert scale 1-5)                      | 0.28                       | 0.60                             | -0.41                               |

|                                                                                                                                                               |       |      |      |
|---------------------------------------------------------------------------------------------------------------------------------------------------------------|-------|------|------|
| Do you feel there are barriers to your needs being met in<br>official situations (e.g., work, landlord)? never – always (Likert<br>scale 1-5)                 | 0.41  | 0.64 | 0.14 |
| Life satisfaction (Likert scale 1-7)<br>(e.g., if I could live my life over, I would change almost<br>nothing; the conditions of my life are excellent, etc.) | -0.61 | 0.56 | 0.10 |
| <hr/> <i>Note.</i> CELF-5 = Clinical Evaluation of Language Fundamentals, 5th Edition; A` = A prime; * = $p < .05$ ; ** = $p < .01$                           |       |      |      |
