# Supplementary material
Source: publisher figshare collection journal article supplement (https://asha.figshare.com/articles/dataset/_/27997529)
Supplement: Supplementary file 7 [file 2]

**Supplemental Material S2.** Group-level participant characteristics.

|                                   | DLD<br><i>n</i> = 5 |
|-----------------------------------|---------------------|
| Age                               | 15.60<br>3.05       |
| Sex assigned at birth             | F = 2<br>M = 3      |
| Maternal Education                |                     |
| <i>High school or equivalency</i> | 1                   |
| <i>Associate degree</i>           | 1                   |
| <i>Bachelor's degree</i>          | 1                   |
| <i>Master's degree</i>            | 2                   |
| <i>Professional degree</i>        | 0                   |
| <i>Doctorate degree</i>           | 0                   |
| Family Income                     | 97,222<br>10,592    |
| Race                              |                     |
| <i>Asian</i>                      | 0                   |
| <i>Black/African American</i>     | 1                   |
| <i>More than one race</i>         | 0                   |
| <i>Not reported</i>               | 0                   |
| <i>White</i>                      | 4                   |
| Ethnicity                         |                     |
| <i>Hispanic or Latino</i>         | 1                   |
| <i>Not Hispanic or Latino</i>     | 4                   |
| <i>Not reported</i>               | 0                   |
| Grammaticality                    | 0.57                |
| Judgement A`                      | 0.06                |
| WASI Matrix                       | 44.00               |
| Reasoning                         | 7.94                |

*Note.* DLD = developmental language disorder; F = female; M = male; A` = A prime; WASI = Wechsler Abbreviated Intelligence Scale, 2nd Edition, *t*-scores.
